# Supplementary material for: Cell and Tissue Nanomechanics: From Early Development to Carcinogenesis
Source: MDPI journal article supplement (doi:10.3390/biomedicines10020345), 2022-02-01
Supplement: s1 [file s1]

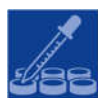

**Table S1:** Types of cytoskeletal proteins, its distribution in human organism according to the Human protein atlas and J. Schweizer et. al (2006) [139].

| Protein type | Protein    | Gene name | Tissue distribution                                                                                                                                                     | Tumor prognostic marker                                                                                                      |
|--------------|------------|-----------|-------------------------------------------------------------------------------------------------------------------------------------------------------------------------|------------------------------------------------------------------------------------------------------------------------------|
| IF Type 1    | Keratin 9  | KRT9      | Sole of foot, Adrenal gland                                                                                                                                             | Not prognostic, enriched in melanoma                                                                                         |
|              | Keratin 10 | KRT10     | skin                                                                                                                                                                    | Unfavorable in renal cancer, enriched in melanoma                                                                            |
|              | Keratin 12 | KRT12     | Cornea                                                                                                                                                                  | Not prognostic, detected in some tumors                                                                                      |
|              | Keratin 13 | KRT13     | Oral mucosa, esophagus, urinary bladder, vagina, cervix, uterine                                                                                                        | Unfavorable in renal cancer, pancreatic cancer; detected in many tumors                                                      |
|              | Keratin 14 | KRT14     | Oral mucosa, esophagus, prostate, vagina, cervix, uterine, breast                                                                                                       | Favorable in breast cancer; group enriched (cervical cancer, head and neck cancer, melanoma); detected in many tumors        |
|              | Keratin 15 | KRT15     | Bronchus, oral mucosa, salivary gland, esophagus, duodenum, small intestine, colon, rectum, prostate, vagina, breast, heart muscle, skin, hair, appendix, tonsil        | Favorable in breast cancer; enriched in cervical cancer                                                                      |
|              | Keratin 16 | KRT16     | Lung, oral mucosa, skin, tonsil                                                                                                                                         | Unfavorable in pancreatic cancer; group enriched (cervical cancer, head and neck cancer, melanoma); detected in many tumors. |
|              | Keratin 17 | KRT17     | Nasopharynx, bronchus, oral mucosa, salivary gland, esophagus, pancreas, urinary bladder, testis, epididymis, seminal vesicle, prostate, fallopian tube, breast, tonsil | Unfavorable in renal cancer, favorable in breast cancer; cancer enhanced (head and neck cancer); detected in all tumors.     |

|            |       |                                                                                                                                                                                                                                                                                                                                                        |                                                                                                                                          |
|------------|-------|--------------------------------------------------------------------------------------------------------------------------------------------------------------------------------------------------------------------------------------------------------------------------------------------------------------------------------------------------------|------------------------------------------------------------------------------------------------------------------------------------------|
| Keratin 18 | KRT18 | Thyroid gland, parathyroid gland, adrenal gland, nasopharynx, bronchus, lung, salivary gland, stomach, duodenum, small intestine, colon, rectum, liver, gallbladder, pancreas, kidney, urinary bladder, epididymis, seminal vesicle, prostate, fallopian tube, endometrium, cervix, uterine, placenta, breast, appendix                                | Unfavorable in pancreatic cancer and in lung cancer; low cancer specificity; detected in all tumors.                                     |
| Keratin 19 | KRT19 | Thyroid gland, parathyroid gland, nasopharynx, bronchus, lung, oral mucosa, salivary gland, esophagus, stomach, duodenum, small intestine, colon, rectum, liver, gallbladder, pancreas, kidney, urinary bladder, epididymis, seminal vesicle, prostate, vagina, fallopian tube, endometrium, cervix, uterine, placenta, breast, skin, appendix, tonsil | Unfavorable in renal and in pancreatic cancer; low cancer specificity; detected in many tumors.                                          |
| Keratin 20 | KRT20 | Stomach, duodenum, small intestine, colon, rectum, urinary bladder, appendix                                                                                                                                                                                                                                                                           | Unfavorable in renal and in liver cancer; group enriched (colorectal cancer, stomach cancer, urothelial cancer; detected in many tumors. |

|             |        |                                                                                                                                                                                                                  |                                                                                                 |
|-------------|--------|------------------------------------------------------------------------------------------------------------------------------------------------------------------------------------------------------------------|-------------------------------------------------------------------------------------------------|
| Keratin 23  | KRT23  | Cerebral cortex, thyroid gland, parathyroid gland, adrenal gland, respiratory system, digestive system (exclude liver), genitourinary system, muscles, soft tissue, skin, appendix, tonsil, tonsil, bone marrow. | Unfavorable in urothelial cancer; low cancer specificity; detected in many tumors.              |
| Keratin 24  | KRT24  | Detected in all organs exclude cerebellum, hippocampus, caudate, spleen, lymph node                                                                                                                              | Not prognostic, cancer enhanced (head and neck cancer); detected in some tumors.                |
| Keratin 25  | KRT25  | Hair                                                                                                                                                                                                             | Not prognostic, not detected in cancer                                                          |
| Keratin 26  | KRT26  | Hair                                                                                                                                                                                                             | Not prognostic, not detected in cancer                                                          |
| Keratin 27  | KRT27  | Hair                                                                                                                                                                                                             | Not prognostic, cancer enhanced (endometrial cancer); detected in some tumors.                  |
| Keratin 28  | KRT28  | Hair                                                                                                                                                                                                             | Not prognostic, cancer enhanced (cervical cancer, endometrial cancer); detected in some tumors. |
| Keratin 31  | KRT31  | Cerebral cortex, cerebellum, olfactory region, pons and medulla, corpus callosum, spinal cord, salivary gland, esophagus, cervix, uterine, breast, skeletal muscle, adipose tissue, skin, thymus, tonsil         | Not prognostic, low cancer specificity, detected in many tumors.                                |
| Keratin 32  | KRT32  | Pending normal tissue annotation.                                                                                                                                                                                | Not prognostic, not detected in cancer                                                          |
| Keratin 33A | KRT33A | Hair                                                                                                                                                                                                             | Not prognostic, cancer enhanced (urothelial cancer); detected in some tumors.                   |

|           |             |        |                                                           |                                                                                                    |
|-----------|-------------|--------|-----------------------------------------------------------|----------------------------------------------------------------------------------------------------|
|           | Keratin 33B | KRT33B | Hair                                                      | Not prognostic, cancer enhanced (urothelial cancer); detected in single tumors.                    |
|           | Keratin 34  | KRT34  | Hair                                                      | Not prognostic, cancer enhanced (head and neck cancer); detected in some tumors.                   |
|           | Keratin 35  | KRT35  | Hair                                                      | Not prognostic, not detected in cancer                                                             |
|           | Keratin 36  | KRT36  | Pending normal tissue annotation.                         | Not prognostic, cancer enhanced (head and neck cancer); detected in single tumors.                 |
|           | Keratin 37  | KRT37  | Pending normal tissue annotation.                         | Not prognostic, not detected in cancer                                                             |
|           | Keratin 38  | KRT38  | Pending normal tissue annotation.                         | Not prognostic, group enriched (head and neck cancer, urothelial cancer); detected in some tumors. |
|           | Keratin 39  | KRT39  | Pending normal tissue annotation.                         | Not prognostic, not detected in cancer                                                             |
|           | Keratin 40  | KRT40  | Adrenal gland, stomach, colon, testis, soft tissue, hair. | Not prognostic, cancer enhanced (colorectal cancer); detected in some tumors.                      |
| IF Type 2 | Keratin 1   | KRT1   | Oral mucosa, esophagus, vagina, cervix, uterine, skin     | Not prognostic, group enriched (head and neck cancer, melanoma); detected in many tumors.          |
|           | Keratin 2   | KRT2   | Esophagus, vagina, cervix, uterine, skin.                 | Not prognostic, group enriched (head and neck cancer, melanoma); detected in some tumors.          |
|           | Keratin 3   | KRT3   | Pending normal tissue annotation.                         | Not prognostic, cancer enhanced (head and neck cancer); detected in some tumors.                   |

|            |       |                                                                                                                                                                                                                                                                 |                                                                                                                                                                   |
|------------|-------|-----------------------------------------------------------------------------------------------------------------------------------------------------------------------------------------------------------------------------------------------------------------|-------------------------------------------------------------------------------------------------------------------------------------------------------------------|
| Keratin 4  | KRT4  | Nasopharynx, bronchus, oral mucosa, esophagus, vagina, cervix, uterine, tonsil                                                                                                                                                                                  | Unfavorable in ovarian and urothelial cancer; group enriched (cervical cancer, head and neck cancer, stomach cancer, urothelial cancer); detected in many cancer. |
| Keratin 5  | KRT5  | Nasopharynx, bronchus, oral mucosa, salivary gland, esophagus, urinary bladder, epididymis, seminal vesicle, prostate, vagina, cervix, uterine, breast, skin, tonsil                                                                                            | Favorable in breast cancer, cancer enhanced (head and neck cancer), detected in many tumors.                                                                      |
| Keratin 6A | KRT6A | Nasopharynx, bronchus, oral mucosa, esophagus, vagina, cervix, uterine, skin, tonsil                                                                                                                                                                            | Unfavorable in lung cancer; cancer enhanced (head and neck cancer), detected in many tumors.                                                                      |
| Keratin 6B | KRT6B | Nasopharynx, bronchus, oral mucosa, esophagus, vagina, cervix, uterine, skin, tonsil                                                                                                                                                                            | Favorable in breast cancer, unfavorable in urothelial cancer; cancer enhanced (head and neck cancer), detected in many tumors.                                    |
| Keratin 6C | KRT6C | Nasopharynx, bronchus, oral mucosa, esophagus, vagina, cervix, uterine, skin, tonsil                                                                                                                                                                            | Unfavorable in lung cancer; cancer enhanced (head and neck cancer), detected in many tumors.                                                                      |
| Keratin 7  | KRT7  | Thyroid gland, parathyroid gland, nasopharynx, bronchus, lung, salivary gland, esophagus, stomach, liver, gallbladder, pancreas, kidney, urinary bladder, epididymis, seminal vesicle, prostate, fallopian tube, endometrium, cervix, uterine, placenta, breast | Favorable in renal cancer, unfavorable in pancreatic, ovarian and in endometrial cancer; cancer enhanced (urothelial cancer); detected in many tumors.            |

|            |       |                                                                                                                                                                                                                                                                                                                                 |                                                                                    |
|------------|-------|---------------------------------------------------------------------------------------------------------------------------------------------------------------------------------------------------------------------------------------------------------------------------------------------------------------------------------|------------------------------------------------------------------------------------|
| Keratin 8  | KRT8  | Thyroid gland, parathyroid gland, nasopharynx, bronchus, lung, salivary gland, stomach, duodenum, small intestine, colon, rectum, liver, gallbladder, pancreas, kidney, urinary bladder, testis, epididymis, seminal vesicle, prostate, ovary, fallopian tube, endometrium, cervix, uterine, placenta, breast, appendix, tonsil | Unfavorable in pancreatic cancer; low cancer specificity, detected in many tumors. |
| Keratin 71 | KRT71 | Hair                                                                                                                                                                                                                                                                                                                            | Not prognostic, cancer enhanced (endometrial cancer); detected in single tumors.   |
| Keratin 72 | KRT72 | Hair                                                                                                                                                                                                                                                                                                                            | Not prognostic; not detected in tumors.                                            |
| Keratin 73 | KRT73 | Hair                                                                                                                                                                                                                                                                                                                            | Not prognostic; not detected in tumors.                                            |
| Keratin 74 | KRT74 | Hair                                                                                                                                                                                                                                                                                                                            | Not prognostic; not detected in tumors.                                            |
| Keratin 75 | KRT75 | Nasopharynx, bronchus, oral mucosa, salivary gland, esophagus, colon, rectum, urinary bladder, epididymis, seminal vesicle, prostate, vagina, cervix, uterine, skin, hair, tonsil                                                                                                                                               | Not prognostic, cancer enhanced (head and neck cancer); detected in many tumors.   |
| Keratin 76 | KRT76 | Oral mucosa, vagina, skin, tonsil                                                                                                                                                                                                                                                                                               | Not prognostic, cancer enhanced (head and neck cancer); detected in single tumors. |
| Keratin 77 | KRT77 | Hippocampus, oral mucosa, vagina, cervix uterine, skin                                                                                                                                                                                                                                                                          | Not prognostic; low cancer specificity; detected in some tumors.                   |

|            |       |                                                                                                                                                                                                                                                                                                                      |                                                                                                                                             |
|------------|-------|----------------------------------------------------------------------------------------------------------------------------------------------------------------------------------------------------------------------------------------------------------------------------------------------------------------------|---------------------------------------------------------------------------------------------------------------------------------------------|
| Keratin 78 | KRT78 | Oral mucosa, esophagus, vagina, cervix, uterine, skin, tonsil                                                                                                                                                                                                                                                        | Not prognostic, cancer enhanced (head and neck cancer); detected in many tumors.                                                            |
| Keratin 79 | KRT79 | Nasopharynx, bronchus, oral mucosa, salivary gland, esophagus, vagina, cervix, uterine, breast, skin, hair, tonsil                                                                                                                                                                                                   | Not prognostic; group enriched (breast cancer, cervical cancer, head and neck cancer, melanoma, urothelial cancer); detected in some tumors |
| Keratin 80 | KRT80 | Thyroid gland, parathyroid gland, adrenal gland, lung, salivary gland, esophagus, tongue, colon, rectum, gallbladder, pancreas, kidney, urinary bladder, testis, epididymis, seminal vesicle, prostate, ductus deferens, vagina, ovary, fallopian tube, endometrium, cervix, uterine, placenta, breast, skin, tonsil | Unfavorable in breast cancer, low cancer specificity, detected in many tumors.                                                              |
| Keratin 81 | KRT81 | Hair                                                                                                                                                                                                                                                                                                                 | Not prognostic, cancer enhanced (breast cancer, cervical cancer); detected in many tumors.                                                  |
| Keratin 82 | KRT82 | Hair                                                                                                                                                                                                                                                                                                                 | Not prognostic; not detected in tumors.                                                                                                     |
| Keratin 83 | KRT83 | Hair                                                                                                                                                                                                                                                                                                                 | Not prognostic, cancer enhanced (thyroid cancer); detected in some tumors.                                                                  |
| Keratin 84 | KRT84 | Adipose tissue, hair                                                                                                                                                                                                                                                                                                 | Not prognostic, cancer enhanced (head and neck cancer); detected in single tumors.                                                          |
| Keratin 85 | KRT85 | Hair                                                                                                                                                                                                                                                                                                                 | Not prognostic; not detected in tumors.                                                                                                     |

|             |                                       |       |                                                                                                                                                                                                                                                                                                                                            |                                                                                                               |
|-------------|---------------------------------------|-------|--------------------------------------------------------------------------------------------------------------------------------------------------------------------------------------------------------------------------------------------------------------------------------------------------------------------------------------------|---------------------------------------------------------------------------------------------------------------|
|             | Keratin 86                            | KRT86 | Hair                                                                                                                                                                                                                                                                                                                                       | Not prognostic; low cancer specificity, detected in many tumors.                                              |
| IF Type III | Vimentin                              | VIM   | Cerebral cortex, hippocampus, caudate, thyroid gland, adrenal gland, nasopharynx, bronchus, lung, colon, liver, pancreas, kidney, testis, epididymis, seminal vesicle, vagina, ovary, fallopian tube, endometrium, cervix, uterine, placenta, breast, soft tissue, adipose tissue, skin, appendix, spleen, lymph node, tonsil, bone marrow | Favorable in endometrial cancer, unfavorable in renal cancer; low cancer specificity, detected in all tumors. |
|             | Desmin                                | DES   | Heart muscle, smooth muscle, skeletal muscle                                                                                                                                                                                                                                                                                               | Unfavorable in renal cancer; cancer enhanced (prostate cancer); detected in all tumors.                       |
|             | Glial fibrillar acidic protein (GFAP) | GFAP  | Cerebral cortex, cerebellum, hippocampus, caudate, testis                                                                                                                                                                                                                                                                                  | Not prognostic; cancer enriched (glioma), detected in some tumors.                                            |
|             | Peripherin                            | PRPH  | Dorsal raphe, adrenal gland, colon, testis, soft tissue                                                                                                                                                                                                                                                                                    | Unfavorable in glioma; low cancer specificity; detected in some cancer.                                       |
| IF Type IV  | Neurofilament light NF-L              | NEFL  | Cerebral cortex, cerebellum, hippocampus, soft tissue                                                                                                                                                                                                                                                                                      | Unfavorable in renal cancer; cancer enhanced (renal cancer); detected in many tumors.                         |
|             | Neurofilament medium NF-M             | NEFM  | Cerebral cortex, cerebellum, hippocampus, caudate, colon, placenta, soft tissue                                                                                                                                                                                                                                                            | Not prognostic; low cancer specificity, detected in many tumors.                                              |
|             | Neurofilament heavy NF-H              | NEFH  | Cerebral cortex, cerebellum, hippocampus, caudate, colon, prostate, ovary, soft tissue                                                                                                                                                                                                                                                     | Favorable in breast cancer; group enriched (prostate cancer); detected in many tumors.                        |



|                |                      |       |                                                                                                                                                                                                                                                                                            |                                                                                                                                                          |
|----------------|----------------------|-------|--------------------------------------------------------------------------------------------------------------------------------------------------------------------------------------------------------------------------------------------------------------------------------------------|----------------------------------------------------------------------------------------------------------------------------------------------------------|
|                | $\alpha$ -Internexin | INA   | Cerebral cortex, cerebellum, hippocampus, caudate, adrenal gland, testis                                                                                                                                                                                                                   | Not prognostic; cancer enhanced (testis cancer); detected in many tumors.                                                                                |
| IF Type v      | Lamin A              | LMNA  | Express in all organs                                                                                                                                                                                                                                                                      | Not prognostic; low cancer specificity; detected in all tumors.                                                                                          |
|                | Lamin C              |       |                                                                                                                                                                                                                                                                                            |                                                                                                                                                          |
|                | Lamin B1             | LMNB1 | Express in all organs                                                                                                                                                                                                                                                                      | Unfavorable in renal cancer and in liver cancer; low cancer specificity; detected in all tumors.                                                         |
|                | Lamin B2             | LMNB2 | Express in all organs                                                                                                                                                                                                                                                                      | Favorable in stomach cancer, unfavorable in melanoma, renal cancer, liver cancer and in prostate cancer; low cancer specificity; detected in all tumors. |
| IF Type VI     | Nestin               | NES   | Cerebral cortex, cerebellum, colon, kidney, testis, breast, heart muscle, smooth muscle, skeletal muscle, soft tissue                                                                                                                                                                      | Unfavorable in renal cancer; group enriched (glioma, melanoma, testis cancer); detected in all tumors.                                                   |
| Actin proteins | Actin beta           | ACTB  | Cerebral cortex, lung, salivary gland, stomach, duodenum, small intestine, colon, rectum, gallbladder, pancreas, kidney, testis, epididymis, endometrium, placenta, breast, heart muscle, smooth muscle, skeletal muscle, adipose tissue, appendix, splen, lymph node, tonsil, bone marrow | Unfavorable in renal cancer and in head and neck cancer; low cancer specificity; detected in all tumors.                                                 |
|                | Actin gamma 1        | ACTG1 | Express in all organs                                                                                                                                                                                                                                                                      | Favorable in colorectal cancer; low cancer specificity; detected in all tumors.                                                                          |

|              |                                     |        |                                                                                                                                                                        |                                                                                                                                                                            |
|--------------|-------------------------------------|--------|------------------------------------------------------------------------------------------------------------------------------------------------------------------------|----------------------------------------------------------------------------------------------------------------------------------------------------------------------------|
|              | Actin alpha 1 skeletal muscle       | ACTA1  | Breast, all types of muscles                                                                                                                                           | Not prognostic; group enriched (head and neck cancer, prostate cancer); detected in many tumors.                                                                           |
|              | Actin alpha 2 smooth muscle, aorta  | ACTA2  | Kidney, ovary, endometrium, breast, smooth muscle                                                                                                                      | Unfavorable in renal cancer; low cancer specificity; detected in all tumors.                                                                                               |
|              | Actin alpha cardiac muscle 1        | ACTC1  | Placenta, all types of muscles                                                                                                                                         | Unfavorable in head and neck cancer, urothelial cancer; group enriched (head and neck cancer, prostate cancer, testis cancer, urothelial cancer); detected in many tumors. |
|              | Actin gamma 2 smooth muscle enteric | ACTG2  | lung, stomach, duodenum, small intestine, colon, rectum, liver, gallbladder, pancreas, kidney, testis, epididymis, breast, smooth muscle, appendix, lymph node, tonsil | Unfavorable in renal cancer, cancer enhanced (prostate cancer, stomach cancer); detected in all tumors.                                                                    |
| Microtubules | Tubulin alpha 1a                    | TUBA1A | Express in all organs                                                                                                                                                  | Unfavorable in renal cancer; cancer enriched (glioma); detected in all tumors.                                                                                             |
|              | Tubulin alpha 1b                    | TUBA1B | Express in all organs exclude skeletal muscle.                                                                                                                         | Unfavorable in renal cancer, liver cancer, breast cancer; low cancer specificity; detected in all tumors.                                                                  |
|              | Tubulin alpha 1c                    | TUBA1C | Express in all organs exclude skeletal muscle.                                                                                                                         | Favorable in colorectal cancer, unfavorable in liver cancer, renal cancer, pancreatic cancer, breast cancer, lung cancer; low cancer specificity; detected in all tumors.  |
|              | Tubulin alpha 3c                    | TUBA3C | Testis                                                                                                                                                                 | Not prognostic; low cancer specificity; detected in many tumors.                                                                                                           |

|                           |        |                                                                                                                                                                       |                                                                                                              |
|---------------------------|--------|-----------------------------------------------------------------------------------------------------------------------------------------------------------------------|--------------------------------------------------------------------------------------------------------------|
| Tubulin alpha 3d          | TUBA3D | RNA-based expert annotation could not be performed, due to inconclusive results.                                                                                      | Unfavorable in renal cancer, favorable in breast cancer; low cancer specificity; detected in many tumors.    |
| Tubulin alpha 3e          | TUBA3E | RNA-based expert annotation could not be performed, due to inconclusive results.                                                                                      | Not prognostic; low cancer specificity; detected in some tumors.                                             |
| Tubulin alpha 4a          | TUBA4A | Express in all organs exclude skeletal muscle.                                                                                                                        | Unfavorable in liver cancer; low cancer specificity; detected in all tumors                                  |
| Tubulin alpha 4b          | TUBA4B | Pending normal tissue annotation.                                                                                                                                     | Not prognostic; cancer enriched (endometrial cancer); detected in some tumors.                               |
| Tubulin alpha 8           | TUBA8  | Express in all organs exclude skeletal muscle                                                                                                                         | Not prognostic, not detected in cancer.                                                                      |
| Tubulin beta class I      | TUBB   | Express in all organs exclude cerebellum, parathyroid gland, placenta, muscles.                                                                                       | Unfavorable in renal cancer and in liver cancer; low cancer specificity; detected in all tumors.             |
| Tubulin beta 2A class IIa | TUBB2A | Cerebral cortex, hippocampus, nasopharynx, bronchus, oral mucosa, stomach, duodenum, small intestine, colon, rectum, testis, epididymis, fallopian tube, breast, skin | Unfavorable in urothelial cancer, favorable in renal cancer; low cancer specificity; detected in all tumors. |
| Tubulin beta 2B class IIb | TUBB2B | Cerebral cortex, hippocampus, nasopharynx, bronchus, oral mucosa, stomach, duodenum, colon, rectum, testis, epididymis, fallopian tube, breast, skin                  | Unfavorable in endometrial cancer; cancer enriched (glioma); detected in many tumors.                        |

|                              |        |                                                                                                                                                                            |                                                                                                                               |
|------------------------------|--------|----------------------------------------------------------------------------------------------------------------------------------------------------------------------------|-------------------------------------------------------------------------------------------------------------------------------|
| Tubulin beta 3 class<br>III  | TUBB3  | Cerebral cortex, hippocampus, caudate, nasopharynx, bronchus, oral mucosa, stomach, duodenum, colon, rectum, testis, epididymis, fallopian tube, breast, soft tissue, skin | Not prognostic; low cancer specificity; detected in many tumors.                                                              |
| Tubulin beta 4A<br>class IVa | TUBB4A | Cerebral cortex, hippocampus, adrenal gland, nasopharynx, bronchus, oral mucosa, stomach, duodenum, colon, rectum, testis, epididymis, fallopian tube, breast, skin        | Unfavorable in endometrial cancer; group enriched (glioma, melanoma, testis cancer); detected in many tumors.                 |
| Tubulin beta 4B<br>class IVb | TUBB4B | Express in all organs exclude cerebellum, parathyroid gland, placenta, muscles.                                                                                            | Favorable in thyroid cancer, endometrial cancer, unfavorable in liver cancer; low cancer specificity, detected in all tumors. |
| Tubulin beta 6 class<br>V    | TUBB6  | Express in all tissues exclude cerebellum, parathyroid gland, placenta, muscles.                                                                                           | Unfavorable in renal cancer and in urothelial cancer; low cancer specificity; detected in all tumors.                         |
| Tubulin beta 1 class<br>VI   | TUBB1  | Express in all organs exclude cerebellum, parathyroid gland, muscles.                                                                                                      | Not prognostic, not detected in cancer.                                                                                       |
| Tubulin beta 8 class<br>VIII | TUBB8  | RNA-based expert annotation could not be performed, due to inconclusive results.                                                                                           | Not prognostic; cancer enriched (testis cancer); detected in single tumors.                                                   |
| Tubulin gamma 1              | TUBG1  | Express in all organs exclude hippocampus, esophagus, liver, heart and skeletal muscles.                                                                                   | Unfavorable in liver cancer, renal cancer, favorable in endometrial cancer; low cancer specificity; detected in all tumors.   |
| Tubulin gamma 2              | TUBG2  | Express in all organs.                                                                                                                                                     | Unfavorable in liver cancer and in renal cancer; low cancer specificity; detected in all tumors.                              |

---

|                   |       |                                                        |                                                                                                                                  |
|-------------------|-------|--------------------------------------------------------|----------------------------------------------------------------------------------------------------------------------------------|
| Tubulin delta 1   | TUBD1 | Express in all organs.                                 | Unfavorable in liver cancer and in renal cancer, favorable in colorectal cancer; low cancer specificity; detected in all tumors. |
| Tubulin epsilon 1 | TUBE1 | Express in all organs exclude ovary and smooth muscle. | Not prognostic; low cancer specificity; detected in all tumors.                                                                  |

---
